# Supplementary material for: Plasma-Derived MicroRNA hsa-miR-3677-3p Induces Ferroptosis in Neurons by Regulating ABCB8 in Perioperative Neurocognitive Disorders
Source: Research Square preprint supplement (doi:10.21203/rs.3.rs-6945640/v1), 2025-07-01
Supplement: Supplementary file 1 [file b139a3828144b779639409f6.docx]

**Supplementary Information**

**Plasma-Derived MicroRNA *hsa-miR-3677-3p* Induces Ferroptosis in Neurons by Regulating *ABCB8* in Perioperative Neurocognitive Disorders**

**Running title:** Exosomal *hsa-miR-3677-3p*/*ABCB8* Axis inPND

Yiyan Sun1, Yuanyuan Zuo1, Jingya Zhang1, Ying Wu1, Xiaohuan Xia1,2,4,5,6,7, Jianhui Liu1,*

*1* *Department of Anesthesiology, (Shanghai) Tongji Hospital, School of Medicine, Tongji University*

*2Center for Translational Neurodegeneration and Regenerative Therapy, Tongji Hospital Affiliated to Tongji University School of Medicine, Shanghai, China;*

*3Translational Research Center, Shanghai Yangzhi Rehabilitation Hospital affiliated to Tongji University School of Medicine, Shanghai, China;*

*4State Key Laboratory of Cardiology and Medical Innovation Center, Shanghai East Hospital, School of Medicine, Tongji University, Shanghai, China;*

*5Shanghai Key Laboratory of Anesthesiology and Brain Functional Modulation, Shanghai Fourth People's Hospital, School of Medicine, Tongji University, Shanghai, China;*

*6Translational Research Institute of Brain and Brain-Like Intelligence, Shanghai Fourth People's Hospital affiliated to Tongji University School of Medicine, Shanghai, China;*

*7Innovation center of medical basic research for brain aging and associated diseases, Ministry of Education, Tongji University, Shanghai, China;*

*Correspondence should be addressed to Dr. Jianhui Liu, E-mail: [jianhuiliu_1246@163.com](mailto:jianhuiliu_1246@163.com).


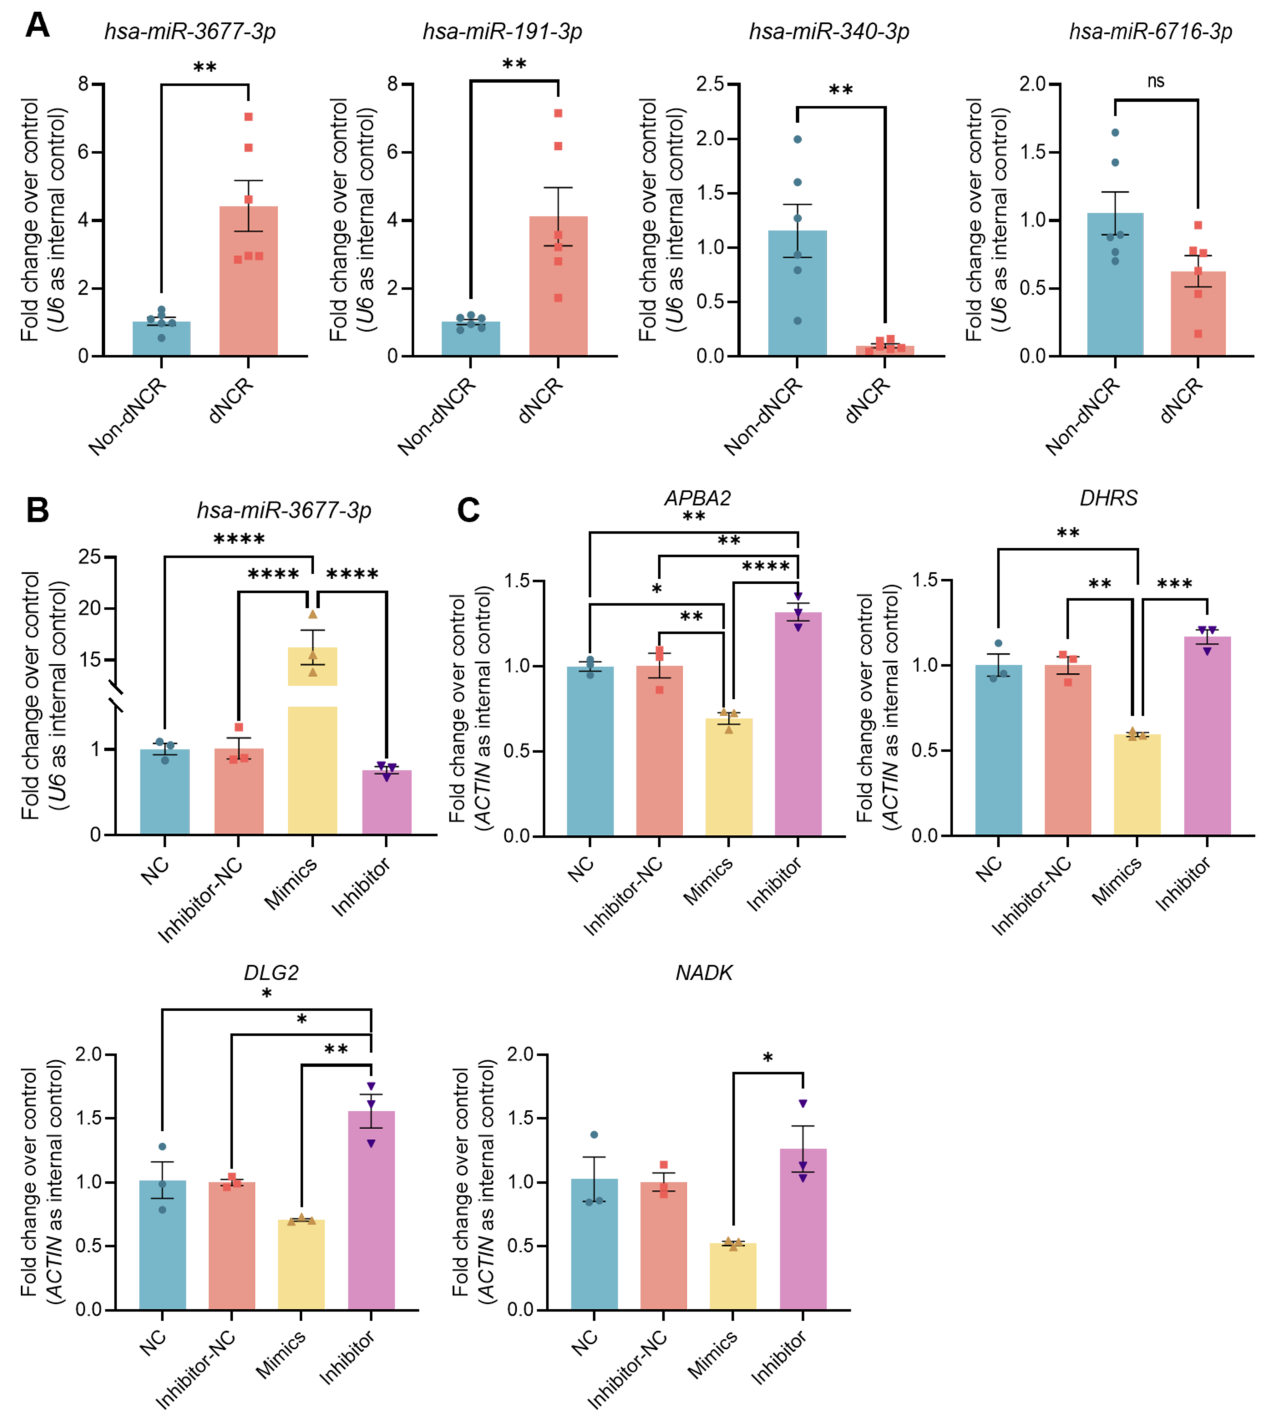


**Figure S1. Validation of DE-miRNAs and Target Gene Regulation of *hsa-miR-3677-3p*.** (A) qRT-PCR analysis of DE-miRNAs (hsa-miR-340-3p, *hsa-miR-6716-3p*, *hsa-miR-3677-3p*, *hsa-miR-191-3p*) in plasma-derived exosomes from dNCR patients compared to the control group (n=6/group). (B) qRT-PCR analysis of transfection efficiency of hsa-miR-3677-3p mimics and inhibitors in SH-SY5Y cells (n=3/group). (C) qRT-PCR analysis of mRNA levels of *DLG2*, *ABCA2*, *DHRS*, and *NADK* in SH-SY5Y cells transfected with hsa-miR-3677-3p mimics and inhibitors (n=3/group). Statistical test in (A): Student’s t test. (B and C): one-way ANOVA with Tukey’s multiple comparisons test. Error bars denote SEM. *P < 0.05, **P < 0.01, ***P < 10−3, ****P < 10−4.
