# Supplementary material for: Plasma-Derived MicroRNA hsa-miR-3677-3p Induces Ferroptosis in Neurons by Regulating ABCB8 in Perioperative Neurocognitive Disorders
Source: Research Square preprint supplement (doi:10.21203/rs.3.rs-6945640/v1), 2025-07-01
Supplement: Supplementary file 2 [file b243f9e7cbe3c2f7f4f17322.docx]

| Gene Symbol | Forward Primer | Reverse Primer |
| --- | --- | --- |
| *ACTIN* | CATGTACGTTGCTATCCAGGC | CTCCTTAATGTCACGCACGAT |
| *ABCB8* | AAGGGACCACGTAGGGAGTTT | TGGACACCATAGAGGATAAGCA |
| *DLG2* | GCCGGTGATTATCCTGGGG | CGCTTTGGCCTCGTAGTATGA |
| *NADK* | CGACGGAGTGATCGTGTCC | GTGTTCCTTGCTTCAGGTGAC |
| *DHRS1* | GACACCCTTCGCGTTGTTG | CAGGCTTCGCACTTCACTCTC |
| *APBA1* | AATGCGGCCTACTCAGGCTA | TAGTCGGCATAGGGCTCGG |
| *GPX4* | GAGGCAAGACCGAAGTAAACTAC | CCGAACTGGTTACACGGGAA |
| *SLC7A11* | GGTCCATTACCAGCTTTTGTACG | AATGTAGCGTCCAAATGCCAG |
| *FTMT* | TGGAGTGTGCTCTACTCTTGG | ACGTGGTCACCTAGTTCTTTGA |
| *FTH1* | TCCTACGTTTACCTGTCCATGT | GTTTGTGCAGTTCCAGTAGTGA |
| *FTL1* | CAGCCTGGTCAATTTGTACCT | GCCAATTCGCGGAAGAAGTG |
| *Universal primer* | AACGCTTCACGAATTTGCGT | |
| *U6* | CTCGCTTCGGCAGCACA | |
| *hsa-miR-3677-3p* | GCTCGTGGGCTCTGGCC | |
| *hsa-miR-363-5p* | CGCGGGTGGATCACGATG | |
| *hsa-miR-191-3p* | CGGCTGCGCTTGGATTTC | |
| *hsa-miR-6716-3p* | CGCGTCCGAACTCTCCATTC | |
| *hsa-miR-340-3p* | GCGCGTCCGTCTCAGTTACTT | |
| *hsa-miR-3677-3p* for RT | GTCGTATCCAGTGCAGGGTCCGAGGTATTCGCACTGGATACGACGGCCGT | |
| *hsa-miR-363-5p* for RT | GTCGTATCCAGTGCAGGGTCCGAGGTATTCGCACTGGATACGACAAATTG | |
| *hsa-miR-191-3p* for RT | GTCGTATCCAGTGCAGGGTCCGAGGTATTCGCACTGGATACGACGGGGAC | |
| *hsa-miR-6716-3p* for RT | GTCGTATCCAGTGCAGGGTCCGAGGTATTCGCACTGGATACGACGCAGAG | |
| *hsa-miR-340-3p* for RT | GTCGTATCCAGTGCAGGGTCCGAGGTATTCGCACTGGATACGACGCTATA | |
