# Supplementary material for: Plasma-Derived MicroRNA hsa-miR-3677-3p Induces Ferroptosis in Neurons by Regulating ABCB8 in Perioperative Neurocognitive Disorders
Source: Research Square preprint supplement (doi:10.21203/rs.3.rs-6945640/v1), 2025-07-01
Supplement: Supplementary file 3 [file ca897f47226d6fa0a3dfe117.docx]

hsa-miR-3677-3p and ABCB8, targetscan predicted two possible binding sites:

**Poorly conserved**

|  | **Predicted consequential pairing of target region (top) and miRNA (bottom)** | **Site type** | **Context++ score** | **Context++ score percentile** | **Weighted context++ score** | **Conserved branch length** | **PCT** | **Predicted relative KD** |
| --- | --- | --- | --- | --- | --- | --- | --- | --- |
| Position 1586-1592 of ABCB8 3' UTR  [hsa-miR-3677-3p](https://mirbase.org/results/?query=hsa-miR-3677-3p" \t "_blank) | 5' ...CCACAAUGGCCAGUUCCCACGAG...  ||||||| |||||||  3' CCGGCACCGGUCUCGGGUGCUC | 7mer-m8 | -0.28 | 79 | -0.17 | 0 | N/A | N/A |
| Position 3027-3033 of ABCB8 3' UTR  [hsa-miR-3677-3p](https://mirbase.org/results/?query=hsa-miR-3677-3p" \t "_blank) | 5' ...UCAUGUGCCAUUGAGCCCACGAU...  |||| |||||||  3' CCGGCACCGGUCUC--GGGUGCUC | 7mer-m8 | -0.28 | 78 | -0.16 | 0 | N/A | N/A |

>hsa-miR-3677-3p

CUCGUGGGCUCUGGCCACGGCC

| **Human ABCB8  ENST00000356058.4   3' UTR length: 3298** |  |
| --- | --- |

GTACATGGCCCTGAACCCCTGCATCCCACTGTCTGGGGGCTGCTGCGTCCCCAAAGAGCAGCTGCGTGGCTCCGTTACATTTCAGAACGTCTGCTTCAGCTACCCCTGCCGCCCCGGCTTCGAGGTGCTGAAAGACTTCACCCTGACGCTGCCCCCTGGCAAGATCGTGGCCCTCGTGGGCCAGTCTGGCGGAGGAAAGACCACCGTGGCTTCCCTGCTGGAGCGCTTCTACGACCCCACGGCAGGCGTGGTGATGCTGGATGGGCGGGACCTGCGCACCCTTGACCCCTCCTGGCTCCGGGGCCAGGTTGTCGGCTTCATCAGCCAGGAGCCCGTCCTGTTTGGGACGACCATCATGGAAAACATCCGCTTTGGGAAGCTGGAAGCTTCCGATGAAGAGGTGTACACAGCCGCCCGGGAAGCGAATGCTCACGAGTTCATCACCAGCTTCCCCGAGGGCTACAACACGGTCGTCGGTGAACGGGGCACTACCCTGTCTGGGGGCCAGAAGCAGCGCCTGGCCATCGCCCGAGCCCTTATCAAGCAGCCCACGGTGCTGATACTGGATGAAGCTACCAGCGCGCTGGATGCAGAGTCCGAGCGGGTTGTACAGGAGGCCCTGGACCGGGCCAGTGCAGGCCGCACGGTGCTGGTAATTGCCCACCGGCTCAGCACTGTCCGTGGGGCCCACTGCATTGTCGTCATGGCCGATGGCCGTGTCTGGGAGGCTGGGACACATGAAGAGCTCCTGAAGAAAGGCGGGCTATACGCCGAGCTCATCCGGAGGCAGGCCCTGGATGCCCCGAGGACAGCGGCCCCACCGCCCAAAAAGCCAGAAGGCCCCAGGAGCCACCAGCACAAGTCCTGAGAAGGGCCCCCTGAGGTGTGGTCGCTGCCAAGCATCAGTGTTAGGGCTGGGGCTCAGCCTGGGGGAGCCTACTGGGGACTGAGCCCCCAGGAGGGCCAGCATGTGGAGAGTCGCTGCGGCTGCTCCTGCTCACAATAAAGCCGGGGCCGAGCAGCTGGCAGGGGAGGCCAATCCCTCCCTCCCCTCCCCAGTCCTGCCGGCTGCCTCCCTCCCACCAGAGTCTGCCAGAGTCATTGGGCTGCAATGGGCAGAGACAGAGTTCCACGAGACACCTCCACTCTATTCTCCCTTTGCCCAGACCCCTCCAGACCTCTCAAGAGACGTTCTGGCCAGTCTCCCTGCCCCACCCAGCAGCTTCAAATTGGCCAGGCCTACAGTAGCTCCAGGGAATTTTTAAAAATCAGGGTCTGGAAGTGGGCCTGGGAATTCAAACCTAGGCTCTTCCCACACCCTTGCTAGGACCTCACTTCCCTAGACTGGCGACTGACTCCCTCTCCTGTGTCCCCACTCCCTCCATGGGAGAAGGAGCCTATCCCCTGGCTCACCCCGGGACCCACAGTCCCCATCTTCCAAACAACCTCCCTCCTTTCTCCCTGCACAGTGAACACAGTCCTGATTTCTAGATTTCACCTCCCCTCCCCACCCACAAGGGACACAGGCCTAACAGGGCCCAACACTTGGGTCAGGGTAGGAGGGACGGGGCCACAATGGCCAGTTCCCACGAGAAGCGCCAGCCTGCCTGGCTGTCTTCCACCGGCCCTGCCCTGTGTGCCTGGCGTCTTTCACCCACTGAGATTGTGAACCAGCCTCCATCTACACCAAGAACACCCAGCACTGAAGGAGATGGGAGGGGCTGATGCCCACCTGGAGCTCTCTGCTTCCTGCCCACAGTGCTGACGAGTACAGAGCTAAATGGAGCAGCTACTGCAGAATCCAGTACAGAATCGGTCCAGGAGGGTGCGGCTGTGGACAGGCCAGCATCCCCAGCAGGTTCTGGGAGGCGCACCTTGAAAGGGGAAGGCAGACATCCTGAGTGATGGGCGCCTGTGGCCCTGAGACTGTGGATGAGGGGGCTAGGCTCCAGCTGGCTTCTGAGGGGCCTGGAAAGGCACACAAGTAGGTCCTTGGCTGAACTGGTGCCCCAGCAGGACCTCGTGTCCCTGCACTGCTGCAGATGCATCAGCCCTCCCCATGTTGGTGCCGCTGTCACTTCCTACTGGGATCCTTCCCCTATCCAGCCACATCCAGGCTGTGGGACTACACGGTGCCCTGTTCCCCTGGGCAGGAGAAGAGGTGGTACCTGCAATGCACCTTCACAGCCAGGCAAGCATTCTGGATTTACCCTGTGTAAAGAAGGGTGGTACCCTCTTTCAGGGGTGTGATACAGTGCATTGATGGAGCAGCTGGTGCTGCTGGGAGGCCAGCCTGGAAGAGGCAGCAGTGGCTCAAGTTTGCGTGCAGGAGCCAGAGTGGGACCCACGGGCTCTTGTGGGTGTGGTTTAGAACTAGATGGTGCTTTGGGGACAAGCCATCCAAAAACCCCAGGCCCACATCCACCCTGATTTGATATCCCACTTCCTGACAGATCAGAGGCTGTGTCTTTAAGCAGTGGAGGTCCAGGAGCAGAGCCTGGGGCTGGTTCACAGCTAAACCCCTCCTTAGGGCAGCCCAGAGTAGGGCCTCAGCTGGCAAGTCCACAAGCCCTGCTGGGGCCCTGCTTGTTGGCCTGACCCCTCCCTCACCAGGCAGCCAGCCAAGGTGGTTCCTGCTTCACCCACTCAGTCATCAGCCTCAGGCTGCCCAAAATGCCTCTGACACCAGATTTATATCTTCTGGGCGGCTTCTTTAAATCCAGCCCTTCACCCGCCCCCTAGAGAAGCAGTGAAACCCCTTGGCTAGTCCAGCTGGAAGAGCTAGACCGCAGGAGCCGCGCCGTCTTCCTAACCTCGCCTCGGCCTTCGCTCCACAGTGGAGAGTGGGAGCCTAGCTGTGCTTGATGCTGAATGCCTGTTTTGAGAGTGTGAGTGGGATCATCTACAGTAAATACTTGCAAAGCATGGCACTGTGGCTCTGGGGAGCTGGTACGCCTGTGCTGTAACCATGGTACTCAGTCCTTCCAAAGTGTTTATTAATCAAGCACCTGTCATGTGCCATTGAGCCCACGATGGGGAATGAGGACAGTCCCTGCCCCCATGAAGCTTGTGTCCTGTTGGGAGGACAGACAGGTGGCCCAGCAGTTGCAGCATGGTGTGTGCACACGTTTGGCTGGTGGAACCATGTTTCTACCACTCATGGTCAAAAAAAGCCCACCAAAGTCCTGGGAGTTCACATCTGTGTGATGATACGGCAACATTGTTTGTAATGGAAAGACTGGACACCCCCAGTGCCCATCAGTGGGGGAGTCATTAAATAAACTATGGTATGTGCACA
